# Supplementary material
Source: PubMed Central journal article supplement (PMC7922751)
Supplement: JCB918029_Supplemental_Material.pdf [file JCB918029_Supplemental_Material.pdf]

## **Supplementary Materials**

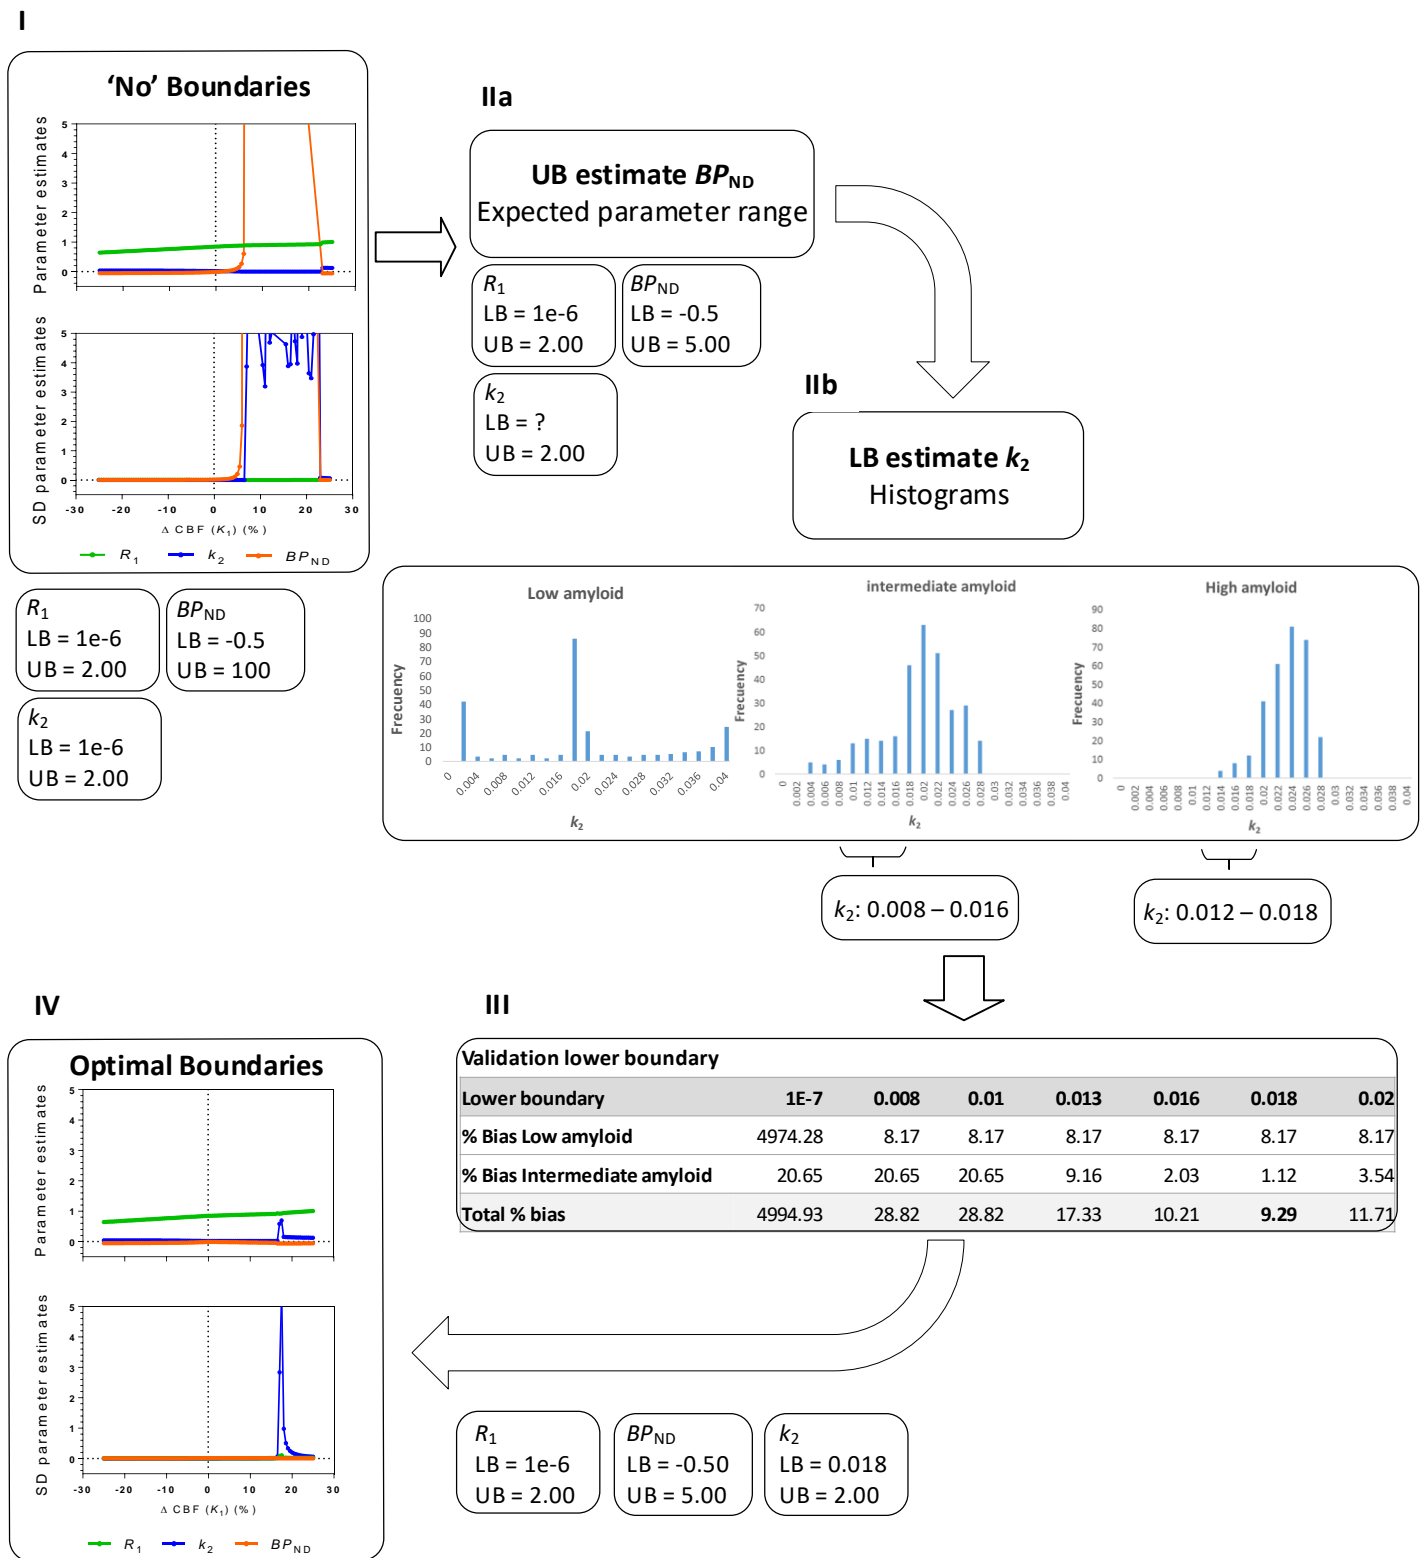

**Supplementary Figure 1. Boundary validation I.** Example of SRTM derived parameters for noiseless full TACs with cortical CBF changes, corresponding to low amyloid. The fitting routine required implementation of boundaries (zero or infinite values not possible), therefore the following start-parameters were used:  $R_1$ ( $1e-6$ ; 2),  $k_2$ ( $1e-6$ ; 2),  $BP_{ND}$ (-0.5; 100). II.  $BP_{ND}$  and  $k_2$  were poorly determined;  $BP_{ND}$  values were enormous while  $k_2$  values approached zero. a)  $BP_{ND}$  upper boundary estimates were adjusted based upon the simulated parameter range and b)  $k_2$  lower boundaries were adjusted based upon parameter histograms across binding levels. III. Lower boundary values were fine-tuned until the lowest overall bias (calculated from the simulated  $BP_{ND}+1$ ) was obtained. IV. Same data as in 1. with new boundaries.

Note: All example values/graphs correspond to the [ $^{18}$ F]flutemetamol tracer, for [ $^{18}$ F]florbetaben the exact same procedure was carried out.

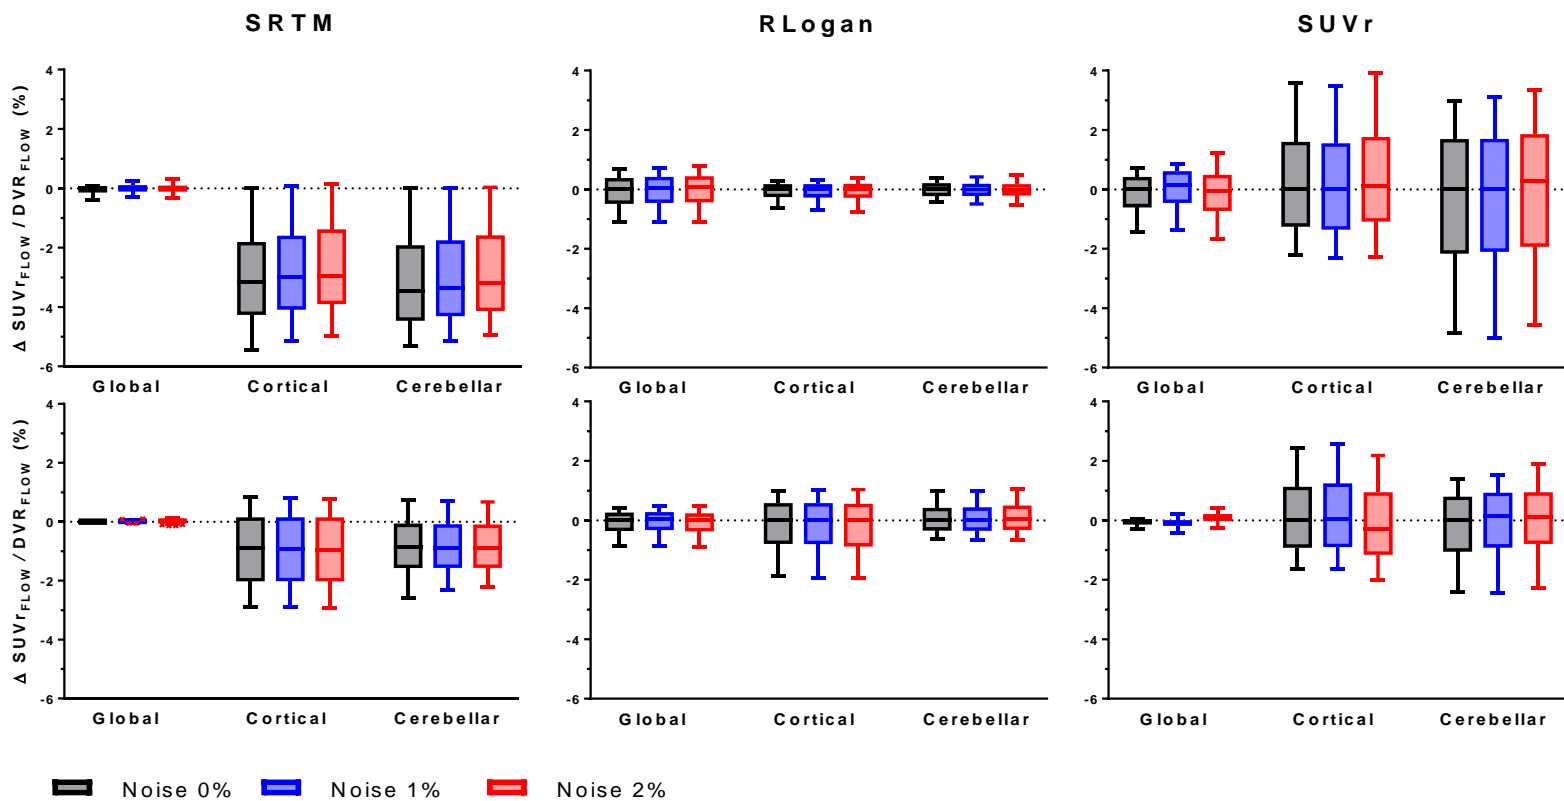

**Supplementary Figure 2.** The effect of noise on sensitivity to CBF changes across methods. Upper row is  $[^{18}\text{F}]$ flutemetamol and bottom row is  $[^{18}\text{F}]$ florbetaben. Note: plots correspond to the lowest level of amyloid load (DVR=1.022, DVR=1.026, for both tracers, respectively. Whiskers were defined according to the Tukey method and outliers are depicted as red crosses.

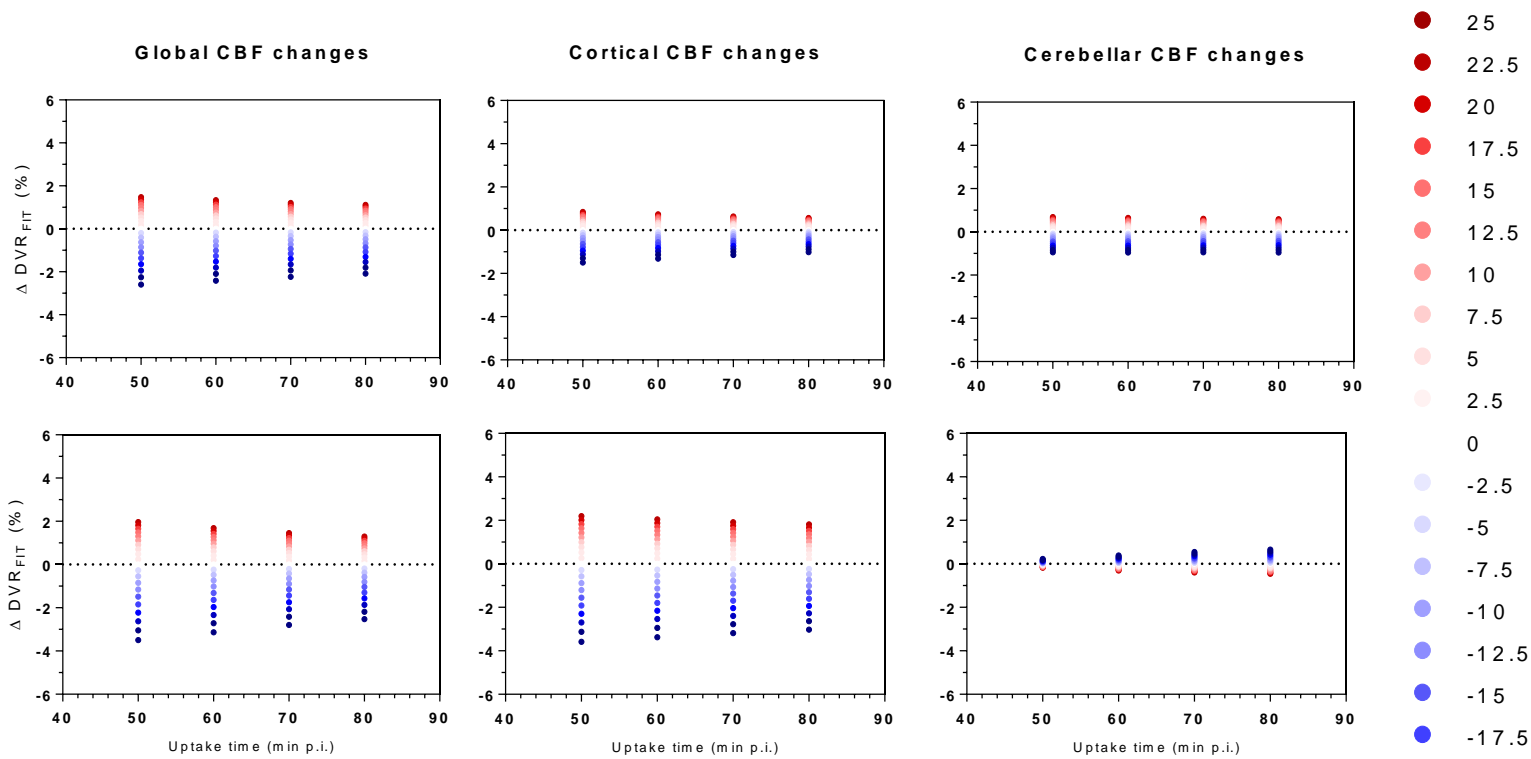

**Supplementary Figure 3.** The effect of linearization start-time on sensitivity to CBF changes for RLogan. Upper row is  $[^{18}\text{F}]$ flutemetamol and bottom row is  $[^{18}\text{F}]$ florbetaben. Results correspond to an intermediate level of amyloid ( $\text{DVR}=1.400$  and  $\text{DVR}=1.538$  for both tracers respectively) Red dots resemble CBF increases and blue dots CBF decreases.
